# Supplementary material for: An Isotopic Ratio Outlier Analysis Approach for Global Metabolomics of Biosynthetically Talented Actinomycetes
Source: MDPI journal article supplement (doi:10.3390/metabo9090181), 2019-09-10
Supplement: s1 [file s1]

# Supplementary Materials for An Isotopic Ratio Outlier Analysis Approach for Global Metabolomics of Biosynthetically Talented Actinomycetes

Jordan Carey<sup>1</sup>, Thanh Nguyen<sup>1</sup>, Jennifer Korchak<sup>1</sup>, Christopher Beecher<sup>2</sup>, Felice de Jong<sup>2</sup> and Amy L. Lane<sup>1,\*</sup>

<sup>1</sup> Chemistry Department, University of North Florida, Jacksonville, FL 32224, USA; Email:

[n00666958@ospreys.unf.edu](mailto:n00666958@ospreys.unf.edu) (J.C.); [n00931601@ospreys.unf.edu](mailto:n00931601@ospreys.unf.edu) (T.N.); [n00958433@ospreys.unf.edu](mailto:n00958433@ospreys.unf.edu) (J.K.)

<sup>2</sup> IROA Technologies, Ann Arbor, MI 48105, USA; Email: [chris@iroatech.com](mailto:chris@iroatech.com) (C.B.); [felice@iroatech.com](mailto:felice@iroatech.com) (F.d.J.)

\* Correspondence: [amy.lane@unf.edu](mailto:amy.lane@unf.edu); Tel.: +01-904-620-2315

| Page # | Item                                                                                                                                                                                     | <u>Contents:</u> |
|--------|------------------------------------------------------------------------------------------------------------------------------------------------------------------------------------------|------------------|
| 2      | <u>Figure S1.</u> Histogram of the number of carbon atoms from <i>N. dassonvillei</i> metabolites detected by IROA UHPLC/MS.                                                             |                  |
| 3-6    | <u>Figure S2.</u> Box-whisker plots of relative abundances for 40 metabolites with largest mean decrease accuracy (MDA).                                                                 |                  |
| 7      | <u>Figure S3.</u> IROA molecular ion peak pair for putative novel C <sub>16</sub> H <sub>24</sub> N <sub>4</sub> O <sub>7</sub> metabolite from <i>N. dassonvillei</i> .                 |                  |
| 8-10   | <u>Figure S4.</u> IROA molecular ion peak pairs for DKPs <b>1-6</b> and <b>10</b> from <i>N. dassonvillei</i> .                                                                          |                  |
| 11     | <u>Table S4.</u> Summary of IROA LC/MS data for 40 metabolites most strongly distinguishing <i>N. dassonvillei</i> bipyridyl treatment from no bipyridyl control groups based on RF MDA. |                  |

---

**Note: Tables S1-S3 are provided as a standalone .xlsx file**

Table S1. Summary of metabolites detected from *N. dassonvillei* chemical extracts by evaluation of UHPLC/MS IROA signals.

Table S2. Ratio of T12C:IS and C12C:IS MS signals for each metabolite detected from *N. dassonvillei* chemical extracts.

Table S3. *N. dassonvillei* metabolites for which univariate statistical comparison of C12C:IS and T12C:IS ratios by unpaired two sample t-test revealed  $p < 0.001$ .

**Figure S1.** Histogram of the number of carbon atoms from 1,332 *N. dassonvillei* metabolites detected by IROA UHPLC/MS. The number of carbon atoms in each metabolite was proposed by finding the  $m/z$  difference between the  $^{12}\text{C}$ - and  $^{13}\text{C}$  monoisotopic molecular ion signal for each analyte.

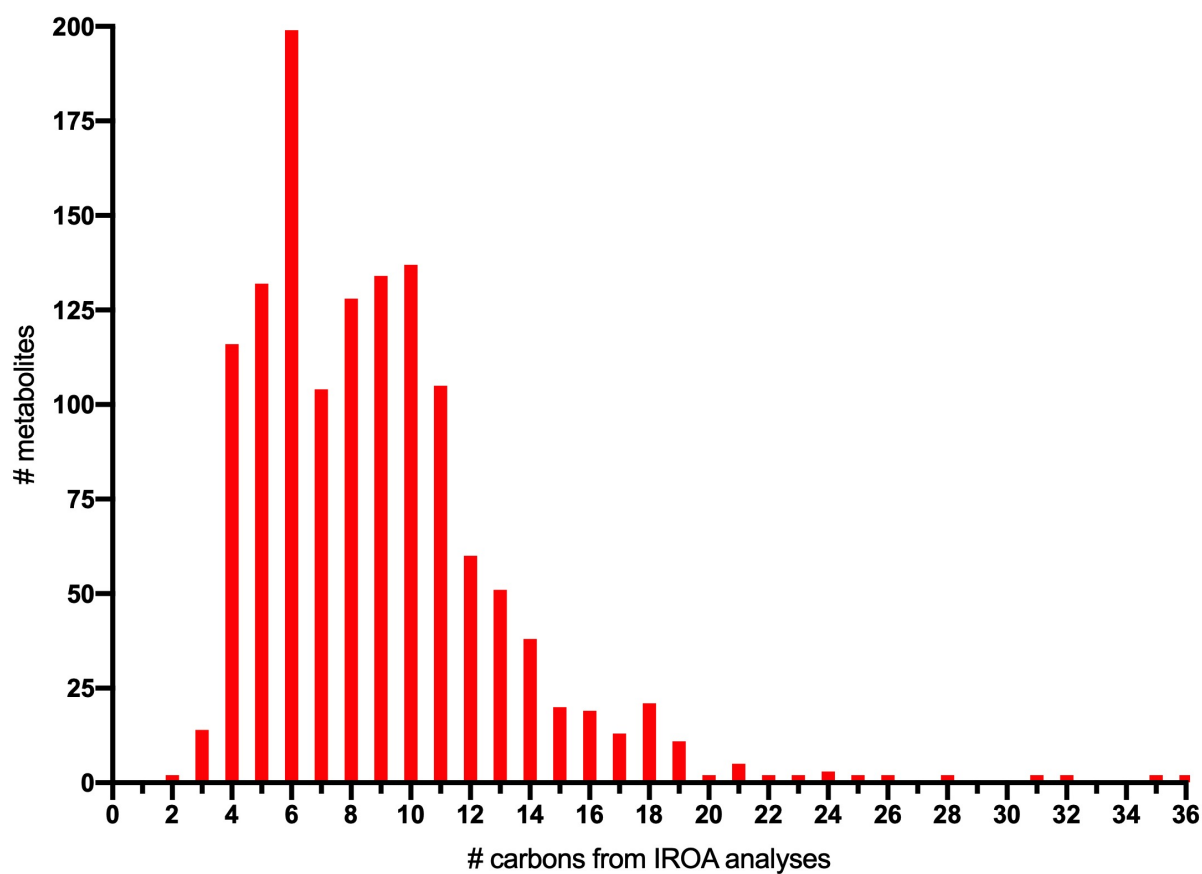

**Figure S2. Box-whisker plots of relative abundances for 40 metabolites with largest mean decrease accuracy (MDA).** MDA indicates which metabolites were most important in differentiating bipyridyl treatment (T12C) from no bipyridyl control (C12C) *N. dassonvillei* metabolomes in random forest (RF) analysis. Plots are shown in order of decreasing MDA; MDA values are in Fig. 2d of the main text and Table S4. Plots show the ratio of T12C:IS (n = 4, green) and C12C:IS (n = 4, blue) peak pairs. The horizontal line in box indicates the mean ratio, whiskers denote range from minimum to maximum, the top border of box indicates 75%<sup>th</sup> percentile, and bottom border of box denotes 25%<sup>th</sup> percentile ratio. The p-value for comparison of metabolite abundance between T12C and C12C was found using an unpaired t-test. Compound IDs (i.e. SECIM.xxx) correspond to metabolites summarized in Table S4.

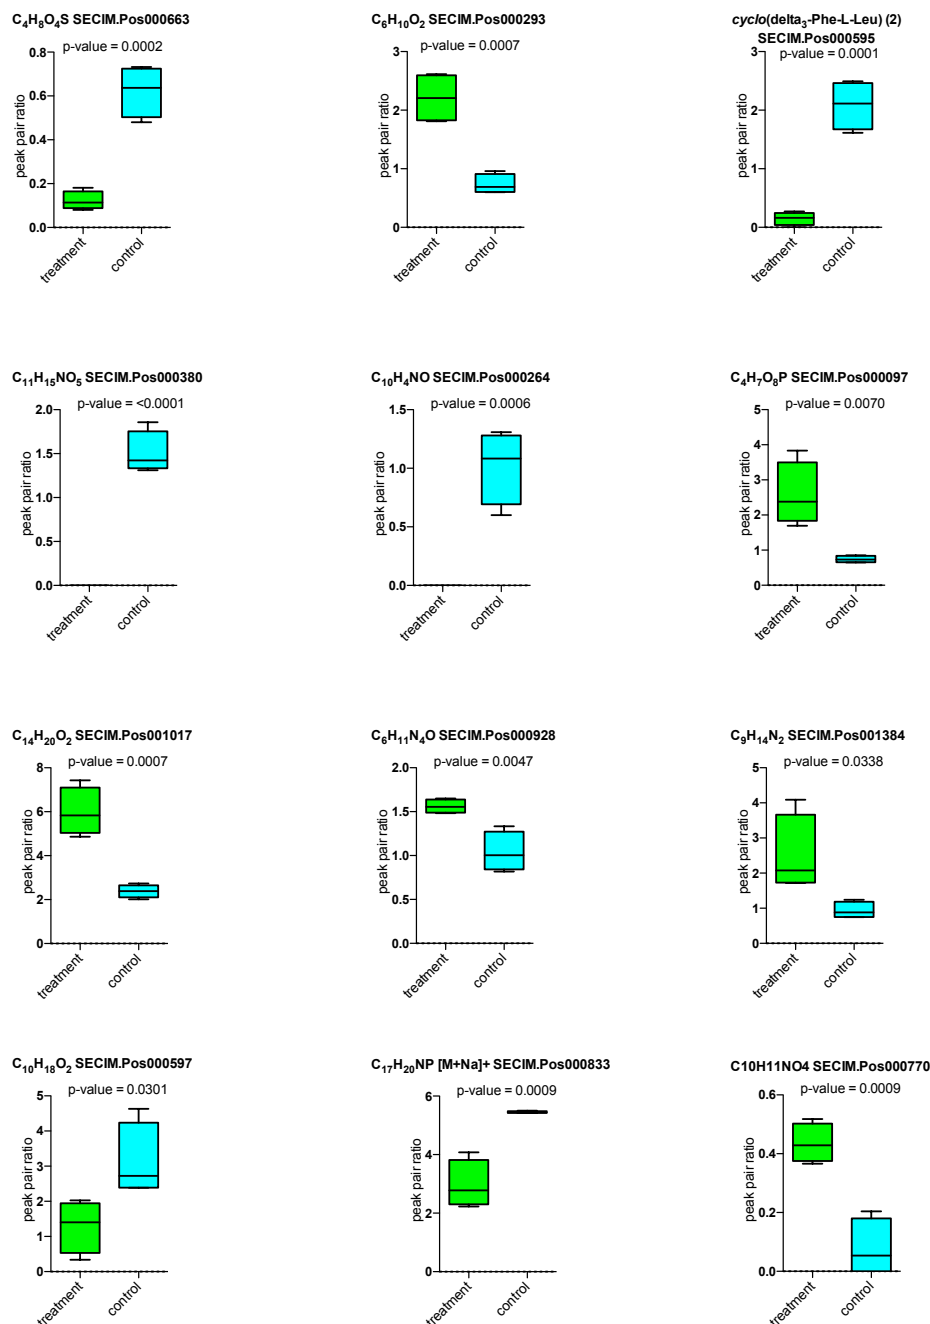

**C<sub>16</sub>H<sub>24</sub>N<sub>4</sub>O<sub>7</sub> SECIM.Pos000546**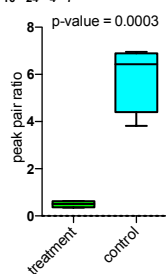**C<sub>16</sub>H<sub>6</sub>N<sub>9</sub>O SECIM.Pos000736**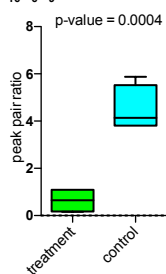**C<sub>6</sub>H<sub>12</sub>O<sub>5</sub>S SECIM.Pos000052**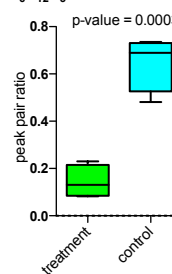**C<sub>9</sub>H<sub>16</sub>N<sub>3</sub>O<sub>4</sub> SECIM.Pos000618**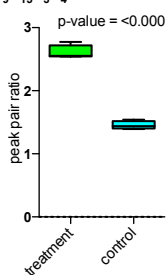**C<sub>11</sub>H<sub>18</sub>N<sub>5</sub>O<sub>2</sub> SECIM.Pos000372**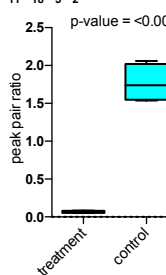**C<sub>11</sub>H<sub>11</sub>NO<sub>2</sub> SECIM.Pos000723**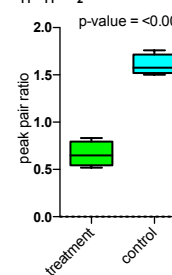**2-aminophenol  
SECIM.Pos000116**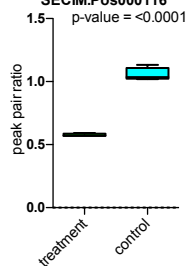**C<sub>10</sub>H<sub>13</sub>NO<sub>5</sub> SECIM.Pos000261**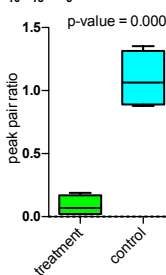**C<sub>16</sub>H<sub>23</sub>NO<sub>3</sub> SECIM.Pos001436**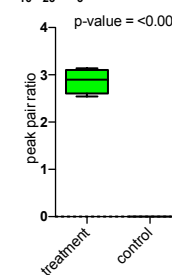**C<sub>8</sub>H<sub>9</sub>NO<sub>2</sub> SECIM.Pos000311**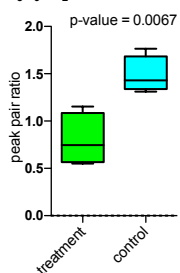**C<sub>10</sub>H<sub>7</sub>NO<sub>2</sub> SECIM.Pos000355**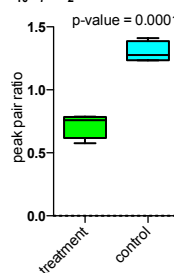**C<sub>9</sub>H<sub>11</sub>N<sub>4</sub>O<sub>2</sub> SECIM.Pos000952**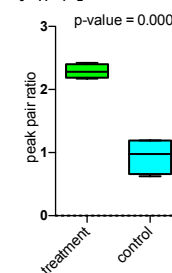

**L-phenylalanine SECIM.Pos001105**

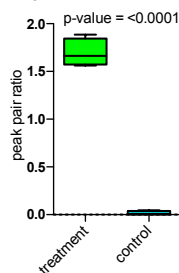

**C<sub>10</sub>H<sub>6</sub>N<sub>6</sub>O<sub>7</sub> SECIM.Pos001284**

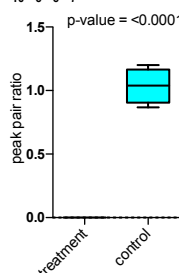

**C<sub>6</sub>H<sub>8</sub>N<sub>3</sub>O<sub>2</sub>S SECIM.Pos001581**

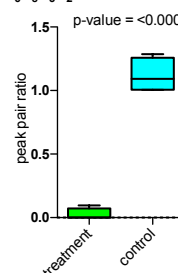

**C<sub>7</sub>H<sub>7</sub>N<sub>4</sub>OS SECIM.Pos000900**

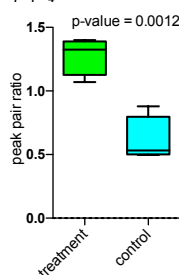

**C<sub>11</sub>H<sub>11</sub>NO<sub>3</sub> SECIM.Pos001324**

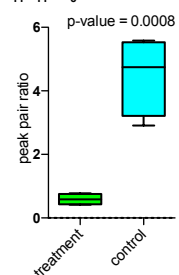

**C<sub>18</sub>H<sub>33</sub>NO<sub>3</sub> SECIM.Pos001433**

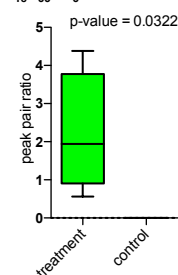

**pyridoxal SECIM.Pos000115**

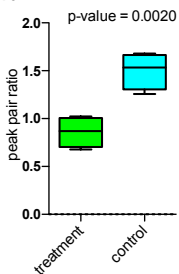

**C<sub>11</sub>H<sub>11</sub>N<sub>3</sub>O<sub>2</sub>S SECIM.Pos000505**

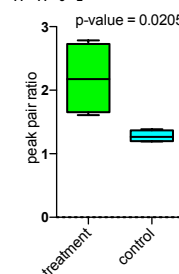

**4-guanidinobutanoate (M+Na) SECIM.Pos001059**

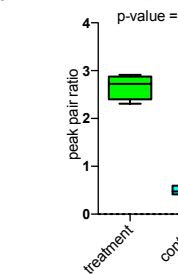

**C<sub>10</sub>H<sub>14</sub>N<sub>5</sub>OS SECIM.Pos001727**

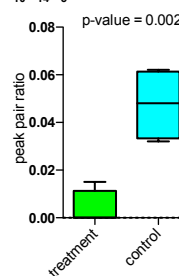

**uracil (M+H) SECIM.Pos000092**

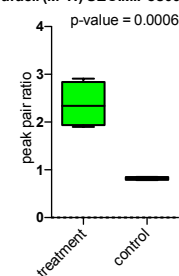

**L-isoleucine SECIM.Pos000125**

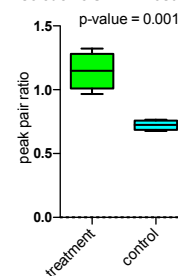

**C<sub>10</sub>H<sub>7</sub>NO<sub>2</sub> SECIM.Pos000354**

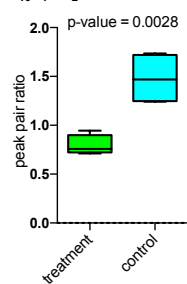

**C<sub>9</sub>H<sub>12</sub>O<sub>3</sub> SECIM.Pos000508**

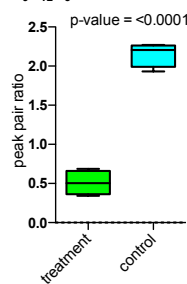

**C<sub>8</sub>H<sub>16</sub>N<sub>2</sub>O<sub>4</sub>P<sub>2</sub> SECIM.Pos000317**

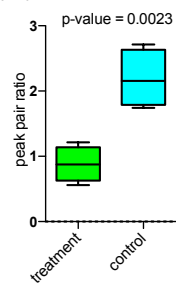

**C<sub>14</sub>H<sub>26</sub>N<sub>2</sub>O<sub>5</sub>S SECIM.Pos000898**

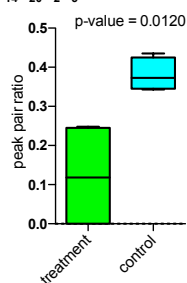

**Figure S3. IROA molecular ion peak pair for putative novel  $C_{16}H_{24}N_4O_7$  metabolite from *N. dassonvillei*.** The number of carbon atoms is indicated by a red arrow, and equals the  $m/z$  difference between the proposed  $[M+H]^+$  signal for  $^{12}C$  and  $^{13}C$  monoisotopes;  $m/z$ 's comprising the IROA peak pair are indicated with enlarged and bolded font. The depicted mass spectrum is from *N. dassonvillei* control culture, was collected at a retention time of 9.8 min, and corresponds to compound ID SECIM.Pos000546 in Tables S1 and S4.

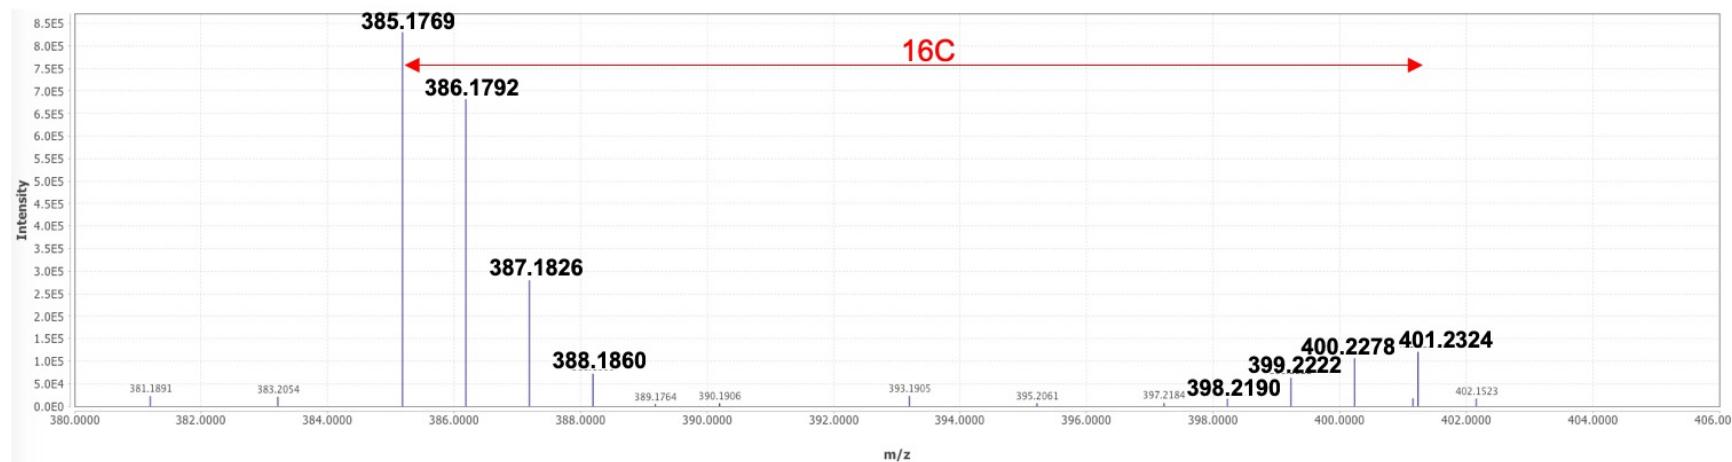

**Figure S4. IROA molecular ion peak pairs for DKPs 1-6 and 10 from *N. dassonvillei*.** The number of carbon atoms is indicated by a red arrow, and equals the  $m/z$  difference between the proposed  $[M+H]^+$  signal for  $^{12}\text{C}$  and  $^{13}\text{C}$  monoisotopes;  $m/z$ 's comprising the IROA peak pair are indicated with enlarged and bolded font. RT indicates retention time at which each mass spectrum was collected. Data shown below were from *N. dassonvillei* control cultures.

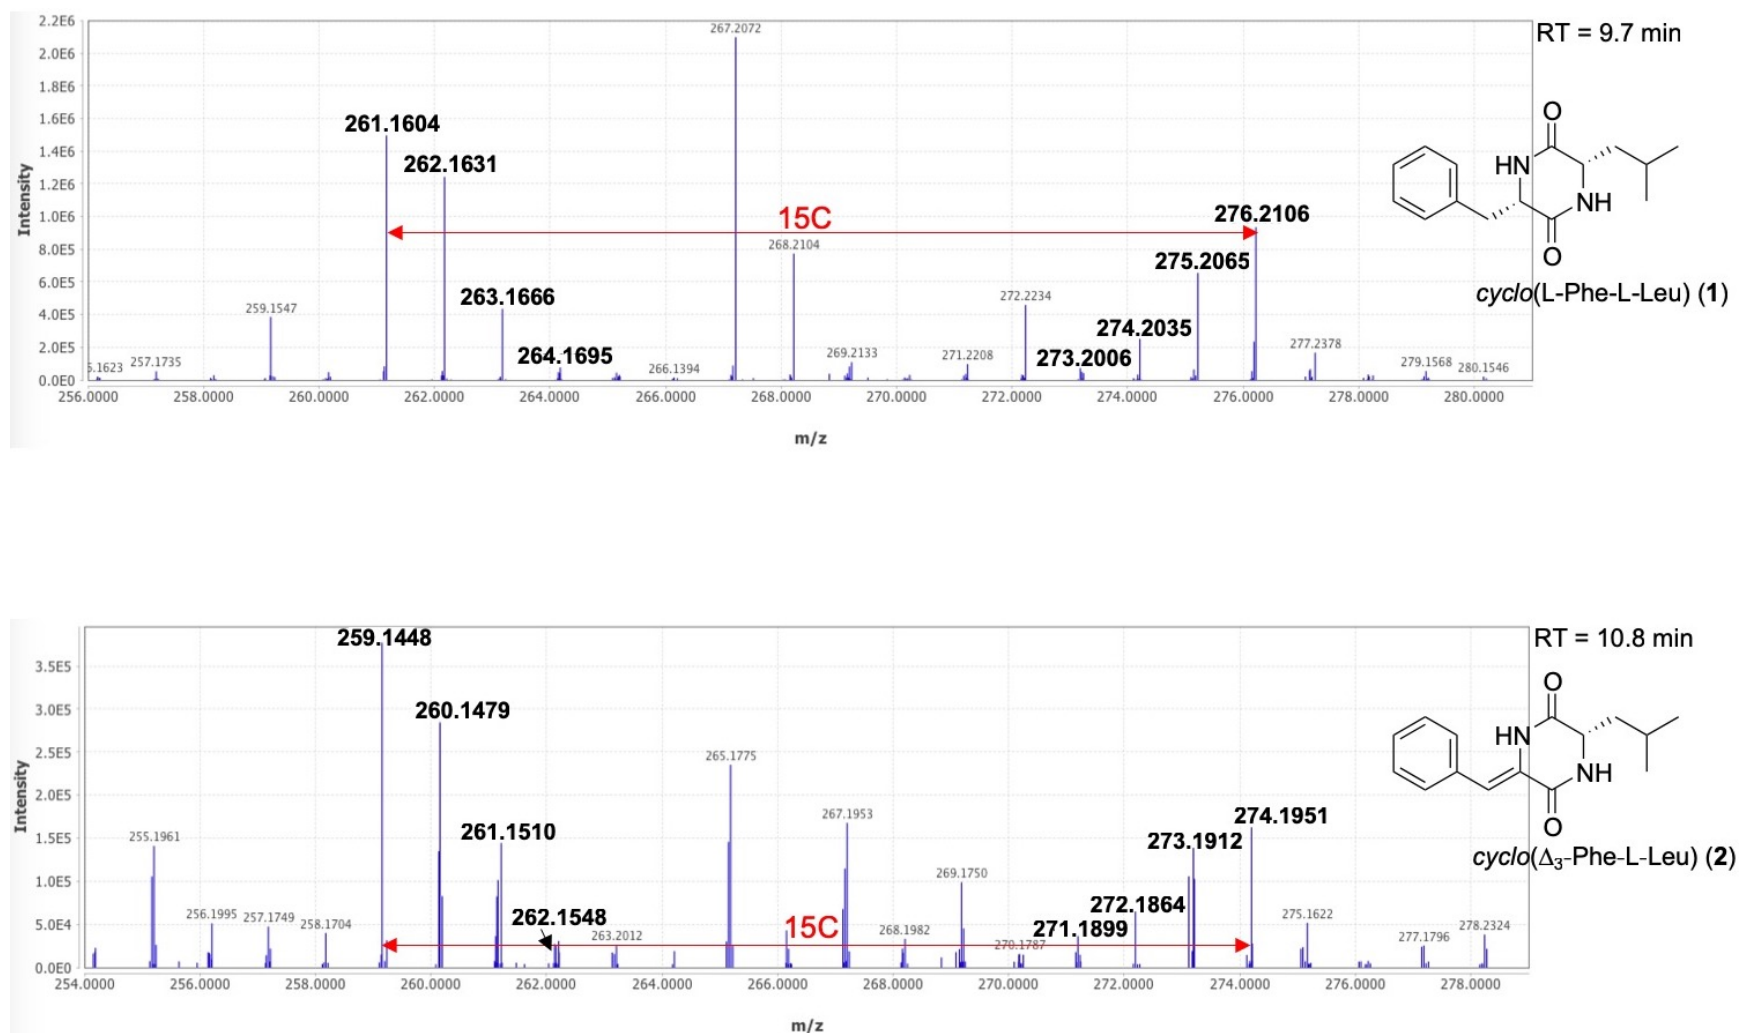



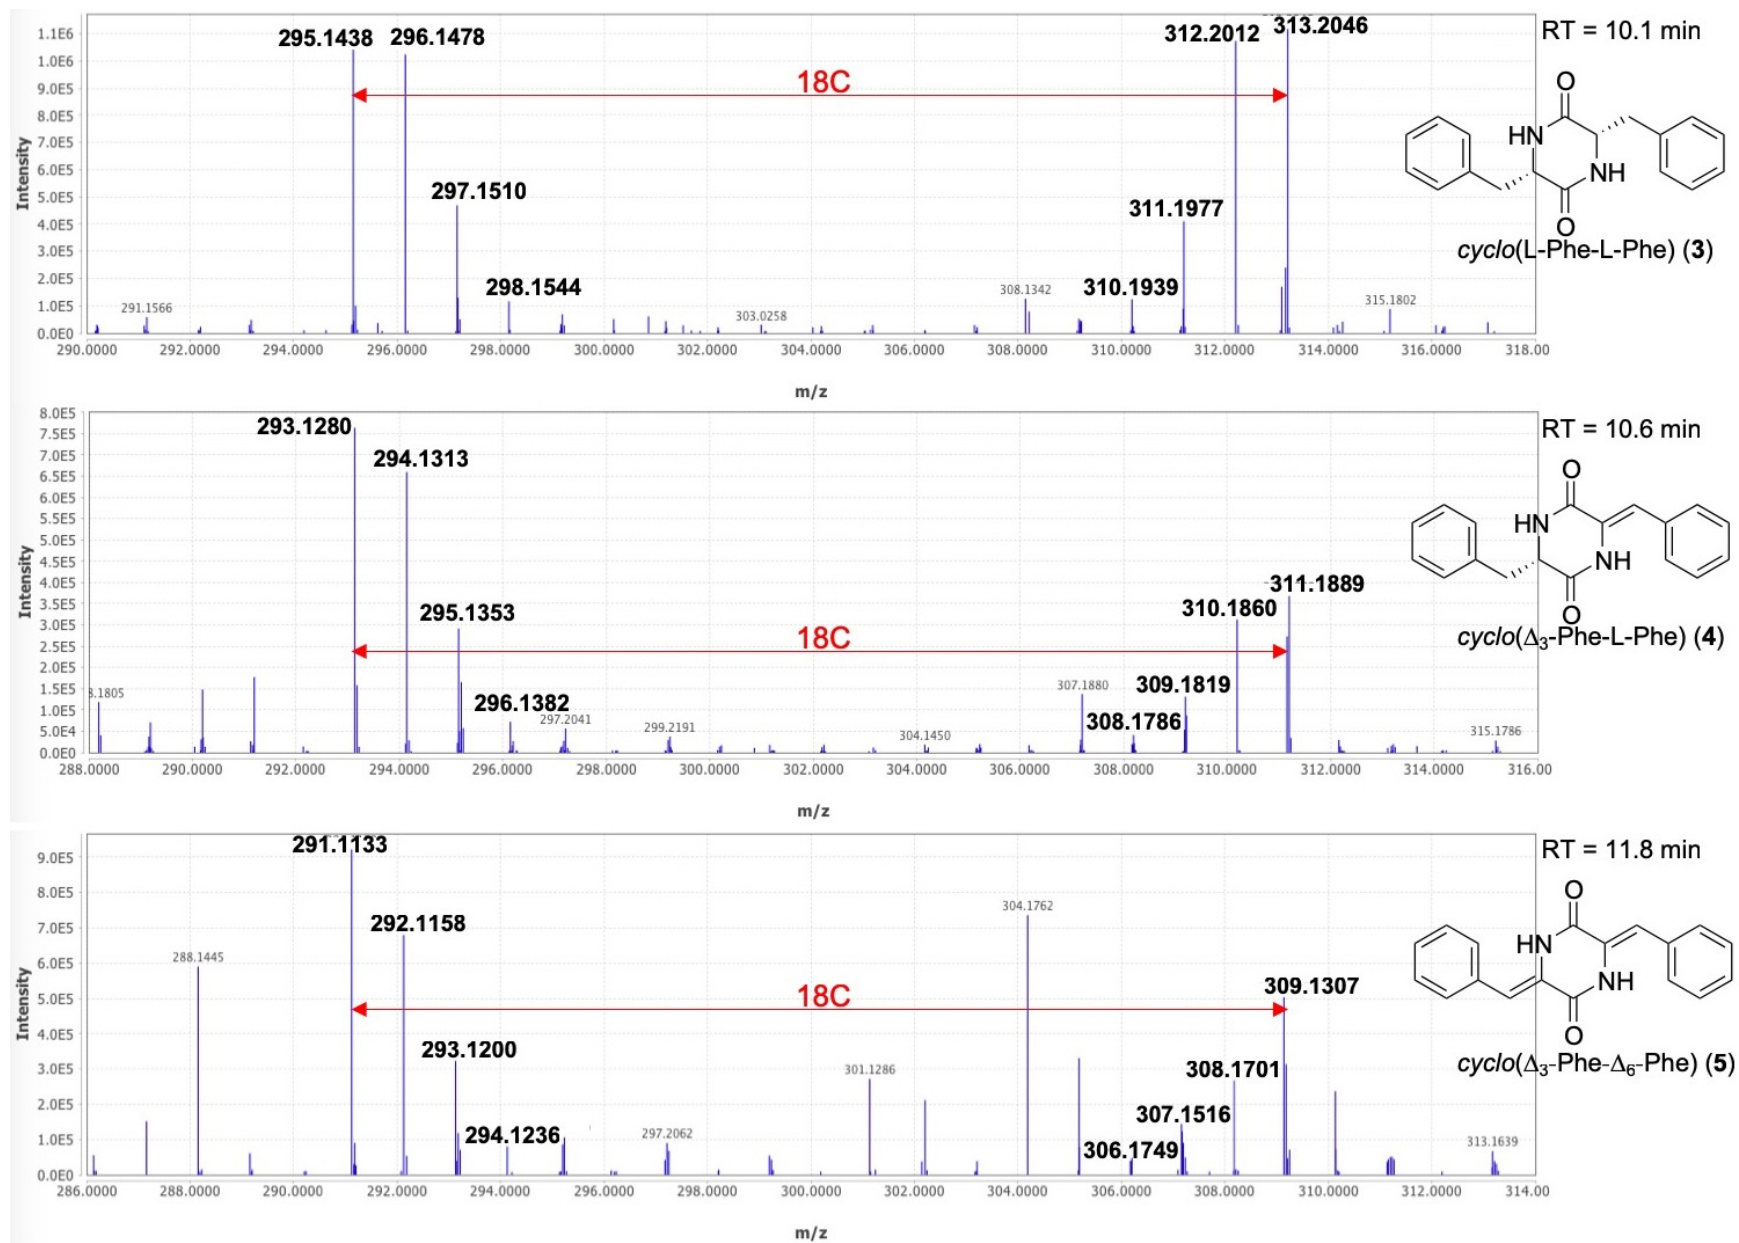

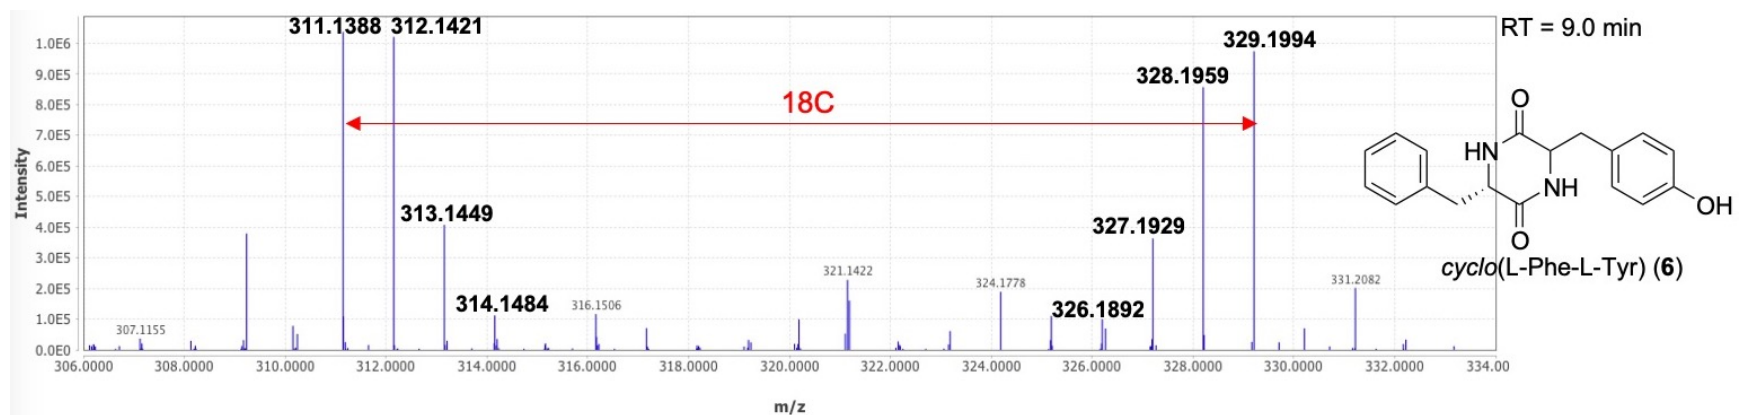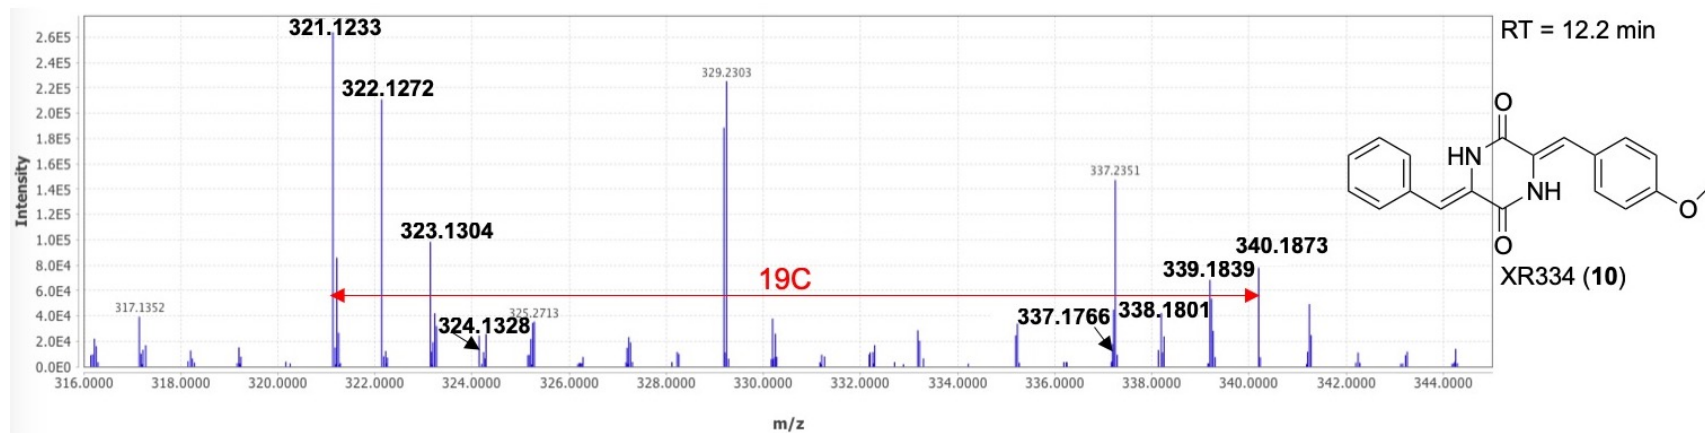

**Table S4. Summary of IROA LC/MS data for 40 metabolites most strongly distinguishing *N. dassonvillei* bipyridyl treatment (T12C) from no bipyridyl control (C12C) groups based on RF MDA.** Molecular formulae were proposed based on correspondence of experimental exact masses with theoretical formulae containing the number of carbon atoms supported by IROA peak pair evaluation. Compound identities were proposed based on correspondence of LC/MS data between *N. dassonvillei* metabolites and a standard library. Experimental exact masses indicate  $m/z$ 's for proposed  $[M+H]^+$   $^{12}C$  molecular ions except for entries denoted by \*, which indicate proposed  $[M+Na]^+$  ions. Box-whisker plots of relative abundances of these metabolites from T12C and C12C are provided in Fig. S2.

| Metabolite ID Code | Proposed formula or name          | Experimental exact mass $m/z$ for $[M+H]^+$ or $[M+Na]^+$ | LC retention time (min) | MDA  |
|--------------------|-----------------------------------|-----------------------------------------------------------|-------------------------|------|
| SECIM.Pos000663    | C4H8O4S                           | 153.0217                                                  | 0.99                    | 2.80 |
| SECIM.Pos000293    | C6H10O2                           | 115.0758                                                  | 7.53                    | 2.44 |
| SECIM.Pos000595    | cyclo( $\Delta_3$ -Phe-L-Leu) (2) | 259.1442                                                  | 10.78                   | 2.43 |
| SECIM.Pos000380    | C11H15NO5                         | 242.1017                                                  | 8.13                    | 2.38 |
| SECIM.Pos000264    | C10H4NO                           | 154.0338                                                  | 7.21                    | 2.22 |
| SECIM.Pos000097    | C4H7O8P                           | 214.9973                                                  | 1.44                    | 2.21 |
| SECIM.Pos001017    | C14H20O2                          | 221.1538                                                  | 14.39                   | 2.20 |
| SECIM.Pos000928    | C6H11N4O                          | 156.1022                                                  | 8.28                    | 2.19 |
| SECIM.Pos001384    | C9H14N2                           | 151.1235                                                  | 7.64                    | 2.18 |
| SECIM.Pos000597    | C10H18O2                          | 171.1381                                                  | 10.92                   | 2.18 |
| SECIM.Pos000833    | C17H20NP                          | 293.1281 *                                                | 10.55                   | 2.00 |
| SECIM.Pos000770    | C10H11NO4                         | 210.0767                                                  | 8.46                    | 1.99 |
| SECIM.Pos000546    | C16H24N4O7                        | 385.1761                                                  | 9.82                    | 1.99 |
| SECIM.Pos000736    | C16H6N9O                          | 171.0441                                                  | 7.64                    | 1.98 |
| SECIM.Pos000052    | C6H12O5S                          | 197.048                                                   | 0.99                    | 1.98 |
| SECIM.Pos000618    | C9H15N3O4                         | 230.1173                                                  | 11.45                   | 1.97 |
| SECIM.Pos000372    | C11H18N5O2                        | 253.1521                                                  | 8.06                    | 1.97 |
| SECIM.Pos000723    | C11H11NO2                         | 190.0862                                                  | 7.42                    | 1.97 |
| SECIM.Pos000116    | 2-aminophenol                     | 110.0605                                                  | 1.98                    | 1.96 |
| SECIM.Pos000261    | C10H13NO5                         | 228.0864                                                  | 7.21                    | 1.96 |
| SECIM.Pos001436    | C16H23NO3                         | 278.1748                                                  | 11.64                   | 1.96 |
| SECIM.Pos000311    | C8H9NO2                           | 152.0707                                                  | 7.64                    | 1.96 |
| SECIM.Pos000355    | C10H7NO2                          | 196.0371                                                  | 7.98                    | 1.96 |
| SECIM.Pos000952    | C9H11N4O2                         | 208.0967                                                  | 8.83                    | 1.96 |
| SECIM.Pos001105    | L-phenylalanine                   | 188.0681 *                                                | 6.23                    | 1.96 |
| SECIM.Pos001284    | C10H6N6O7                         | 162.02                                                    | 7.21                    | 1.96 |
| SECIM.Pos001581    | C6H8N3O2S                         | 187.0397                                                  | 5.87                    | 1.94 |
| SECIM.Pos000900    | C7H7N4OS                          | 196.0431                                                  | 7.37                    | 1.94 |
| SECIM.Pos001324    | C11H11NO3                         | 206.0813                                                  | 8.63                    | 1.94 |
| SECIM.Pos001433    | C18H33NO3                         | 312.2529                                                  | 11.5                    | 1.94 |
| SECIM.Pos000115    | pyridoxal                         | 168.0657                                                  | 1.96                    | 1.93 |
| SECIM.Pos000505    | C11H11N3O2S                       | 249.0557                                                  | 9.34                    | 1.93 |
| SECIM.Pos001059    | 4-guanidinobutanoic acid          | 168.0744 *                                                | 1.23                    | 1.93 |
| SECIM.Pos001727    | C10H14N5OS                        | 253.1015                                                  | 7.96                    | 1.93 |
| SECIM.Pos000092    | uracil                            | 113.0351                                                  | 1.44                    | 1.91 |
| SECIM.Pos000125    | L-isoleucine                      | 132.1024                                                  | 2.5                     | 1.91 |
| SECIM.Pos000354    | C10H7NO2                          | 174.0551                                                  | 7.98                    | 1.91 |
| SECIM.Pos000508    | C9H12O3                           | 169.0863                                                  | 9.37                    | 1.91 |
| SECIM.Pos000317    | C8H16N2O4P2                       | 134.0364                                                  | 7.65                    | 1.90 |
| SECIM.Pos000898    | C14H20N2O5S                       | 329.1167                                                  | 7.35                    | 1.89 |
